# Supplementary material for: Implication of surface oxidation of nanoscale molybdenum carbide on electrocatalytic activity
Source: Royal Society of Chemistry journal article supplement (doi:10.1039/d4ta01746c), 2024-01-01
Supplement: d4ta01746c1.pdf [file d4ta01746c1.pdf]

## Supporting Information

# **Implication of Surface Oxidation of Nanoscale Molybdenum Carbide on Electrocatalytic Activity**

Siying Yu, Ankit Kumar Gautam, Di Gao, Andrew N. Kuhn, Haozhen He, Alexander V.  
Mironenko,\* Hong Yang\*

Department of Chemical and Biomolecular Engineering, University of Illinois Urbana-  
Champaign, 600 S. Mathews Ave., Urbana, IL, 61801, USA

\* Corresponding authors: [hy66@illinois.edu](mailto:hy66@illinois.edu) (HY); [alexmir@illinois.edu](mailto:alexmir@illinois.edu) (AM)

## Computational Notes

### Note S1. Computational details

#### *Bulk cell optimization*

Bulk unit cell optimization was carried out with the bulk unit cell of  $\beta$ -Mo<sub>2</sub>C (P6<sub>3</sub>/mmc)<sup>1</sup> and optimized in VASP with the ISIF of 3 to ensure relaxation of cell dimension and angle. The electronic self-consistent field loop was executed until energy values changed by less than 10<sup>-6</sup> eV and forces were less than 0.02 eV/Å.

#### *Optimal k-point mesh in slab calculations*

The optimal k-space mesh was determined using the electronic binding energy of a single oxygen atom on a clean  $\beta$ -Mo<sub>2</sub>C(011) surface, defined as

$$BE_O = E_{O^*} - E_{clean} - \frac{1}{2}E_{O_2} \quad (S1)$$

where  $E_{O^*}$  is the electronic energy of the slab with a single oxygen attached to an exposed carbon atom,  $E_{clean}$  is the energy of a bare slab, and  $E_{O_2}$  is the energy of an oxygen molecule. Calculations were carried out using the PBE exchange-correlation functional. Binding energy deviations were performed for each grid against the most dense  $5 \times 6 \times 1$   $k$ -point grid, along with average CPU times per one self-consistent field (SCF) iteration (diagonalization).

Comparing the calculated values in **Table S6**, the  $4 \times 5 \times 1$  grid was selected for surface calculations, because it showed errors of less than 10 meV at 2/3 of the computational cost. A more affordable  $2 \times 2 \times 1$  grid was used for computationally intensive NEB and HSE06 calculations.

#### *Dipole corrections in the z-direction*

We evaluated the effect of including dipole corrections in the z-direction using the binding energy of a single oxygen atom, as described above. The inclusion of dipole corrections

only changed the energy by 3 meV (see **Table S7**). Consequently, all surface calculations do not employ dipole corrections.

### ***Other non-default VASP settings***

We made use of  $ISPIN = 2$  (spin polarized),  $ISM EAR = 0$ ,  $SIGMA = 0.05$  eV,  $IVDW = 11$  for DFTD3,  $LREAL = Auto$ , and  $ENCUT = 450$  eV. During geometry optimizations, structures were initially optimized at the  $\Gamma$  point, the SCF termination energy criterion of  $10^{-4}$  eV, and until forces are less than  $0.1$  eV/Å. These structures served as an initial guess for calculations using a  $4 \times 5 \times 1$   $k$ -point grid, SCF loop terminating at the  $10^{-6}$  eV energy difference, and forces less than  $0.05$  eV. This two-level optimization offer the opportunity for a significant speedup in obtaining optimized geometries quickly.

### ***NEB settings***

NEB calculations employed the climbing image method<sup>2,3</sup> with eight images excluding the endpoints. The transition state geometry was further corrected with the dimer method using default dimer settings and  $EDIFF = 1e-6$  eV,  $EDIFFG = -0.05$  eV/ Å. Vibrational frequencies were computed for the transition state to verify the presence of a single imaginary mode.

### ***Bader charge calibration***

Bader charges were computed as single point calculations at the optimized geometry with the  $PREC = Accurate$  setting in the VASP input file. Software output values were then converted to net atomic charges by subtracting them from 6 (the core charge) for Mo atoms. Oxidation states of +0, +2, and +6 were ascribed to the Bader net atomic charges obtained for bulk Mo, bulk Mo<sub>2</sub>C, and bulk MoO<sub>3</sub>, respectively. We observed a near-linear correlation between oxidation states and Bader atomic charges and established the following relationship (**Figure S1**):

$$\text{Oxidation state} = 2.51 \times \text{BaderNetAtomicCharge} + 0.13 \quad (\text{S2})$$

### ***Gibbs free energy and solvation correction***

We computed the vibrational frequencies of the adsorbates (every species on the surface except slab Mo and C) and treated them using the harmonic oscillator approximation. Frequencies under  $100 \text{ cm}^{-1}$  were shifted up to  $100 \text{ cm}^{-1}$ . We approximated Gibbs free energy  $G$  as Helmholtz free energy  $F$  by neglecting the  $PV$  term, according to **Equation S3**. A temperature of 298.15 K was used in all calculations.

$$G = F = E_{elec} + E_{ZPE} + \int_0^T C_{V,vib} dT - TS_{harmonic} \quad (\text{S3})$$

We used VASPsol<sup>4-6</sup> to describe the solvation environment implicitly with the PBE functional and added the energy correction onto the HSE06 electronic energies:

$$G_{HSE06} = E_{elec,HSE06} + (G_{PBE} - E_{PBE}) + (E_{PBE,VASPSOL} - E_{PBE}) \quad (\text{S4})$$

The corrections terms in **Equation S4** allow us to use solvation stabilization and the vibrational frequencies with a much faster PBE exchange-correlation functional, since both vibration and solvation effects have much less influence on relative energies than that with the electronic energy and largely cancel out in energy differences (**Table S1**).

### **Note S2. Gibbs free energy of formation of chemisorbed species**

#### ***Binding energy of adsorbates at low coverage***

We computed the adsorption energies of O\*/H\*/OH\*/H<sub>2</sub>O\* on the clean surface according to **Equations S5-S8**, respectively, as shown below,

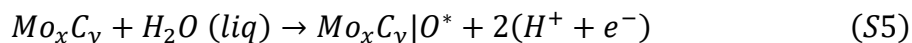

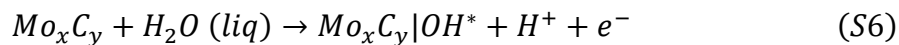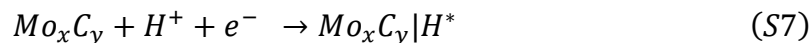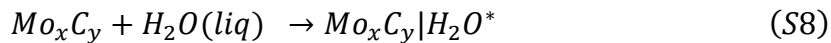

In **Table S8**, we report the binding energies of chemisorbed species at the lowest possible coverage at  $U_{RHE} = 0$  V for the  $(3 \times 1)$   $\beta$ - $Mo_2C(011)$  supercell. All energies are in eV.

### **Note S3. C\*-to-O\* substititon reaction**

The C\* to O\* substitution reaction, also referred to as substitutive oxidation, was assumed to proceed through the following steps on a partially oxidized surface containing  $n$  O\* atoms:

1. “Additive” oxidation of the surface

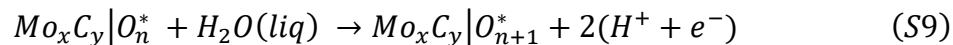

2. CO desorption to form carbon vacancy

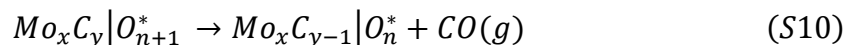

3. “Additive” oxidation on the carbon vacancy

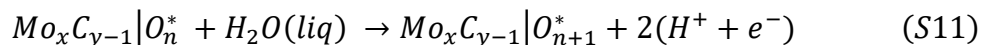

The net effect amounts to C\* replacement with O\* and the production of one CO molecule and 4  $(H^+ + e^-)$  pairs in the process. Due to the strong stabilization associated with proton-electron pair generation, substitutive oxidation is exergonic at all positive potentials (**Table S9** and **Figure S15**).

#### **Note S4. CO and CO<sub>2</sub> desorption barriers**

To evaluate the kinetics of this thermodynamically favorable substitution process, we assumed vacancy reoxidation to be fast due to the high oxophilicity of Mo. Thus, vacancy formation through CO/CO<sub>2</sub> removal is the rate-limiting step (RLS). Since CO<sub>2</sub> formation is associated with nearly complete detachment of CO\* in the transition state (**Table S5**) and exhibits greater barriers than for the removal of CO (**Table 4**), we used the computed barrier for CO removal as a kinetic stability metric of oxidized surfaces. The transition state structures are obtained through CI-NEB and the dimer method. All values are in eV (**Table S5**).

#### **Note S5. Water binding energies at oxidized surfaces**

We calculated water adsorption energies on pre-determined, oxidized surfaces (**Table S4**).

#### **Note S6. Charge transfer estimation**

To obtain an order-of-magnitude estimate of the amount of charge produced in various surface oxidation processes, we employed a simplified model of a catalyst. The calculation proceeds as follows:

$$\begin{aligned} \text{Total Charge} &= (\text{Charge of } 2 e^-) \\ &\times (\text{Number of O}^* \text{ added} + 2 \times \text{number of C substituted}) \\ &\times (\text{Estimated area of all deposited nanoparticles}) \\ &\quad / (\text{Area of } 3 \times 1 \text{ supercell}) \end{aligned} \quad (\text{S12})$$

where the charge generated from one O\* deposition is 2 e<sup>-</sup>.

To get the ratio of areas (*i.e.*, the number of supercells in the material), we first determined the amount of Mo<sub>2</sub>C formed from the amount of a precursor, assuming total conversion of Mo to carbide during carburization:

$$\text{Moles of Mo}_2\text{C formed} = \frac{7}{2} \text{ Moles of } ((\text{NH}_4)_6\text{Mo}_7\text{O}_{24} \cdot 4\text{H}_2\text{O}) \quad (\text{S13})$$

To determine the amount of Mo<sub>2</sub>C on the electrode, we took into account the Mo<sub>2</sub>C:carbon black mass ratio, the weight of a β-Mo<sub>2</sub>C sample (3 mg), and the dilution factor during ink-drop cast of the electrode to get 9.61 μg of catalyst on a single electrode. Using 8.9 g/cm<sup>3</sup> density for β-Mo<sub>2</sub>C and assuming perfectly spherical uniform 5 nm nanoparticles, we get 1.65e+13 nanoparticles on the electrode exposing a total of 1.30e-3 m<sup>2</sup> area. Since each computational supercell exposes 6.35e-19 m<sup>2</sup>, we get a total 2.04e+15 unit cells.

Applying **Equation S12**, we get

$$\text{Charge per O}^* \text{ addition} = 2 \times 1.6 \times 10^{-19} \times 2.04 \times 10^{15} \text{ mC} \quad (\text{S14})$$

$$\text{Charge per O}^* \text{ addition} = 0.65 \text{ mC}$$

Using this value, we found that the (Mo-O)<sub>1</sub>(C-O)<sub>6</sub> to (Mo-O)<sub>3</sub>(C-O)<sub>6</sub> change produces 1.31 mC since it involves deposition of 2 O\*. On the other hand, (Mo-O)<sub>3</sub>(C-O)<sub>6</sub> to (Mo-O)<sub>4</sub>(C-O)<sub>6</sub> gives rise to 0.65 mC. Furthermore, achieving the surface (Mo-O)<sub>12</sub>(C-O)<sub>0</sub> from (Mo-O)<sub>3</sub>(C-O)<sub>6</sub>, involves deposition of 11 O\* (6 of which are removed in the CO desorption), generating a charge of 7.18 mC.

### **Note S7. Current estimation**

We carried out a similar calculation of current densities during slow and fast substitutive oxidation using the obtained energy barrier values.

$$\text{rate} = \frac{k_B T}{h} \exp\left(\frac{-E_a}{k_B T}\right) \left[\frac{1}{\text{sec}\cdot\text{site}}\right] \quad (\text{S15})$$

In this analysis, we counted the total number of exposed C sites to be 1.22e+16 and obtained the estimates of current for oxidation because of CO desorption (**Table S3**).

## Figures

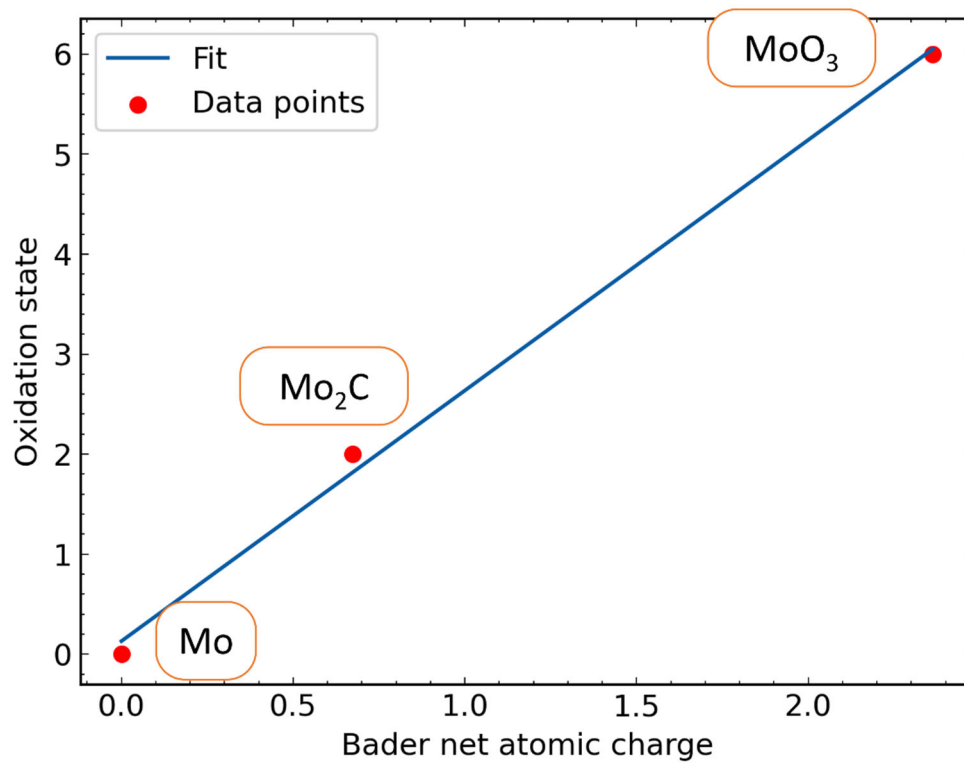

**Figure S1.** Calibration curve for Bader charges and oxidation states.



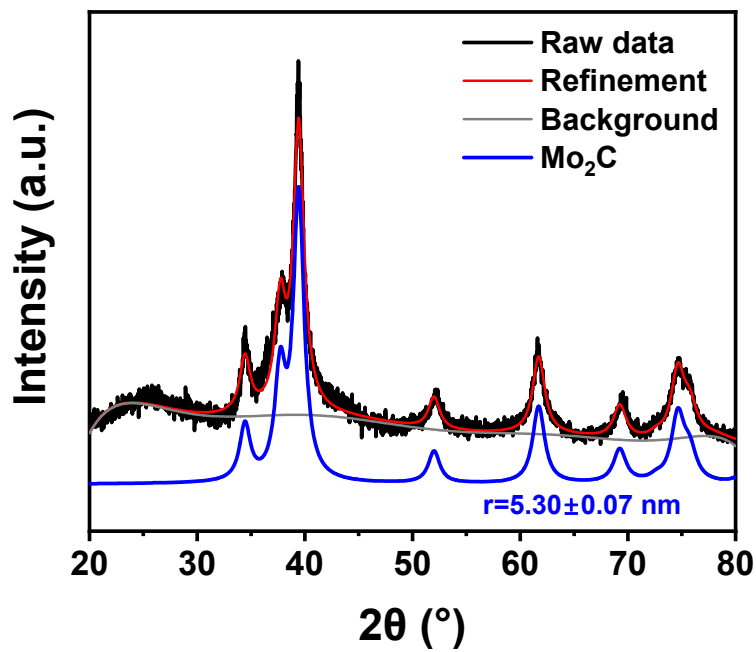

**Figure S2.** Volume-weighted mean crystallite size ( $r$ ) analysis based on the full-profile Rietveld refinement, using the TOPAS software. The calculation is based on Scherrer equation.

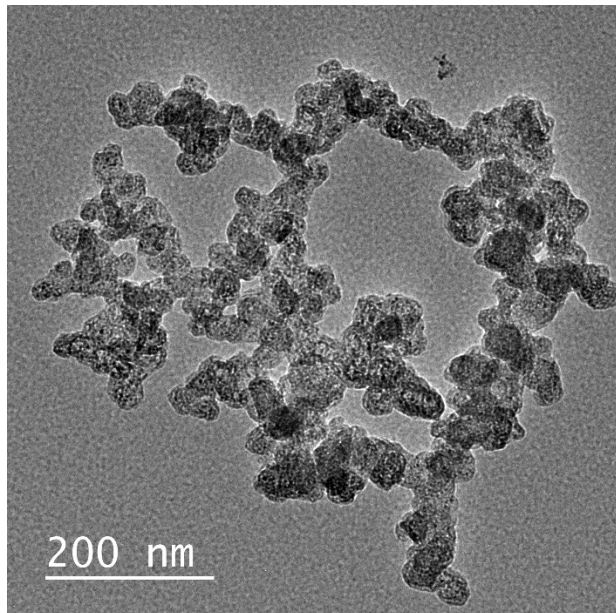

**Figure S3.** TEM micrograph of as-made  $\beta$ -Mo<sub>2</sub>C sample.

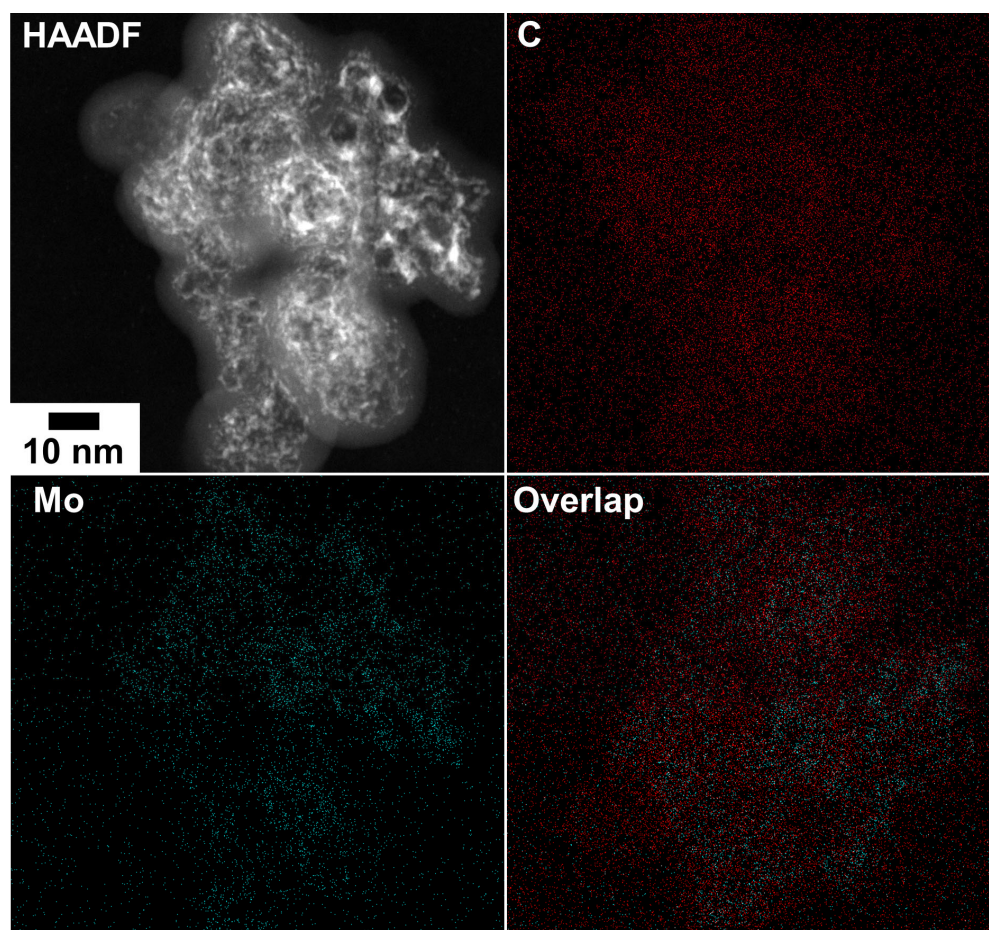

**Figure S4.** STEM-EDS micrographs of as-prepared  $\beta$ -Mo<sub>2</sub>C nanoparticles: (red: carbon; blue: Mo).

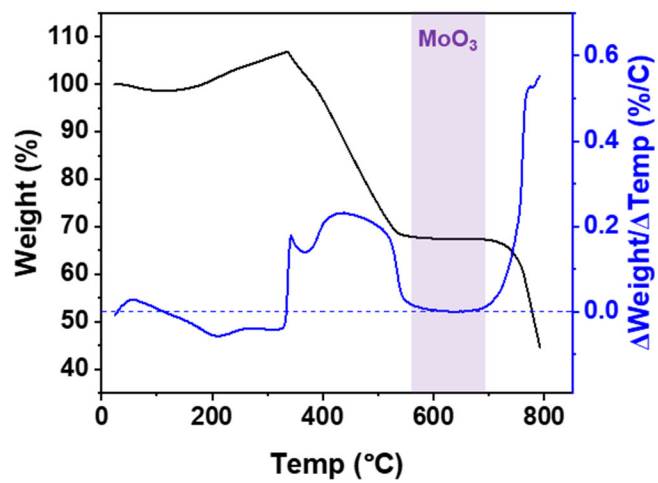

**Figure S5.** Thermogravimetric analysis of freshly prepared  $\beta$ -Mo<sub>2</sub>C sample. The purple region represents the stable MoO<sub>3</sub> phase.<sup>7-9</sup>

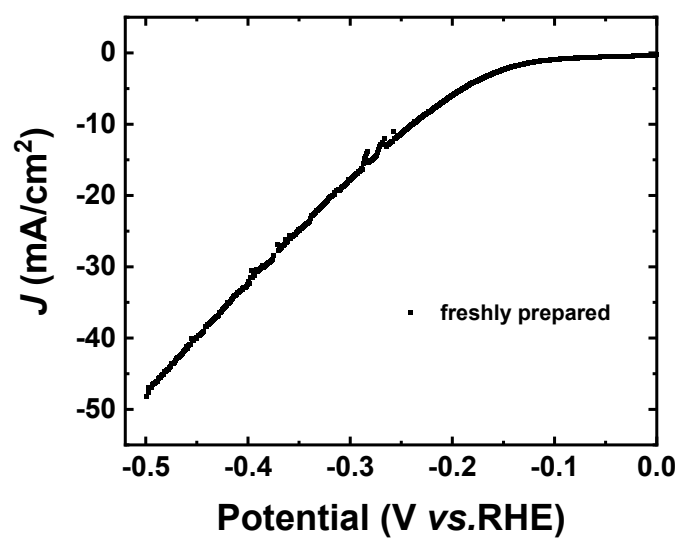

**Figure S6.** HER polarization curve of as-prepared  $\beta$ -Mo<sub>2</sub>C catalyst without the electrochemical oxidation treatment.

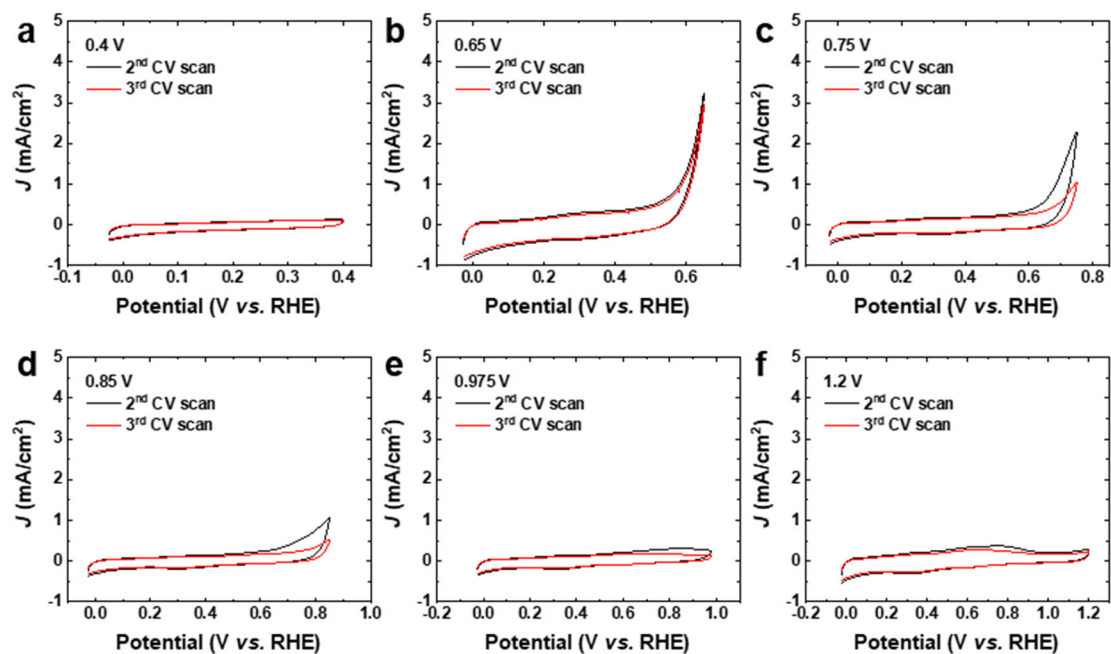

**Figure S7.** CV curves for the second and third cycles of the electrochemical oxidation treatment under different potential windows.

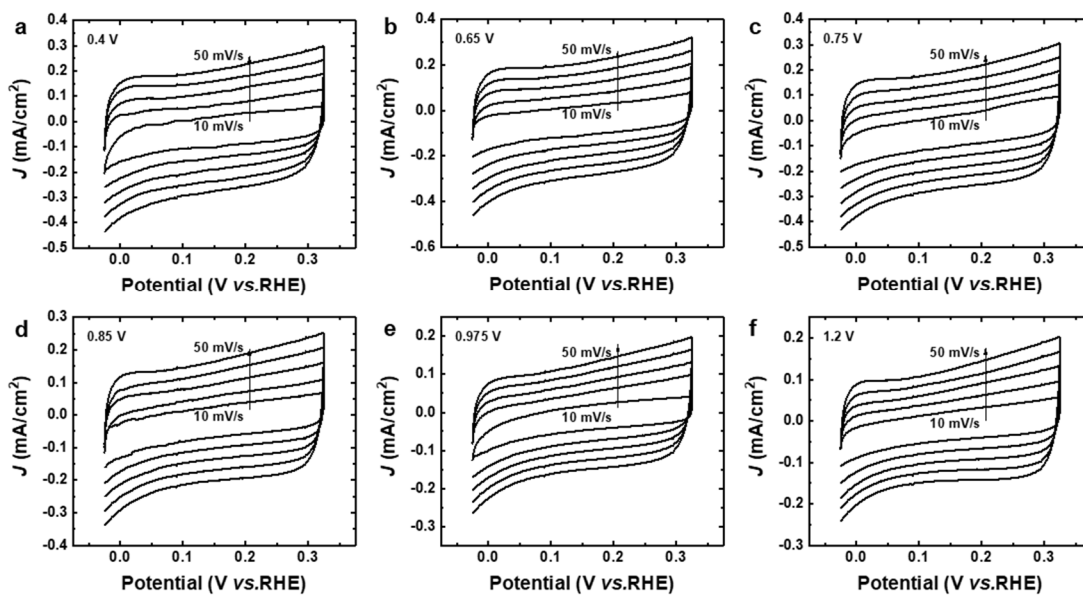

**Figure S8.** Measurement of double-layer capacitance. Cyclic voltammety curves of oxidized  $\beta$ - $\text{Mo}_2\text{C}-x$  catalysts scanned from 10 to 50 mV/s, where  $x$  is (a) 0.4, (b) 0.65, (c) 0.75, (d) 0.85, (e) 0.975, and (f) 1.2.

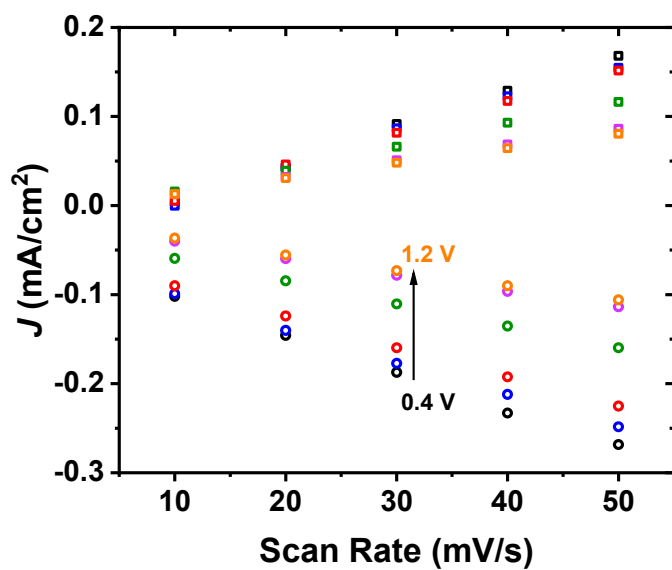

**Figure S9.** Capacitive current densities recorded at 0.15 V as a function of scan rate for electrochemically oxidized  $\beta\text{-Mo}_2\text{C-x}$  catalysts (square: positive scans, circle: negative scans).



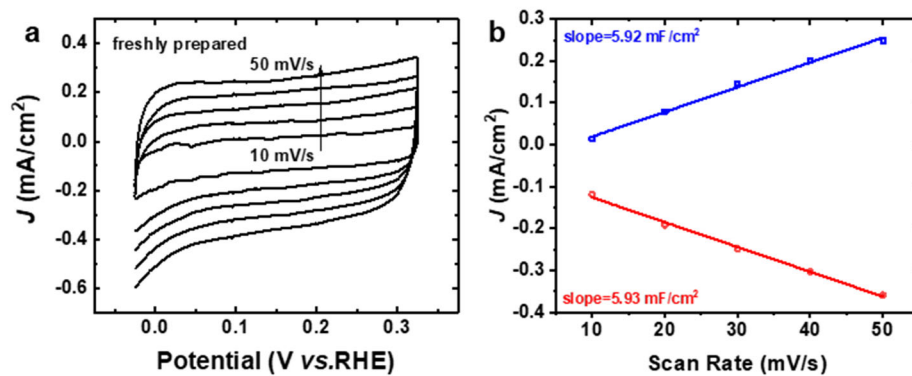

**Figure S10.** (a) CV curves and (b) capacitive current densities as a function of scan rate of as-prepared  $\beta$ -Mo<sub>2</sub>C catalysts. The CV scans were at various rates between 10 and 50 mV/s with an increment of 10 mV/s. The capacitive current densities were measured at 0.15 V.

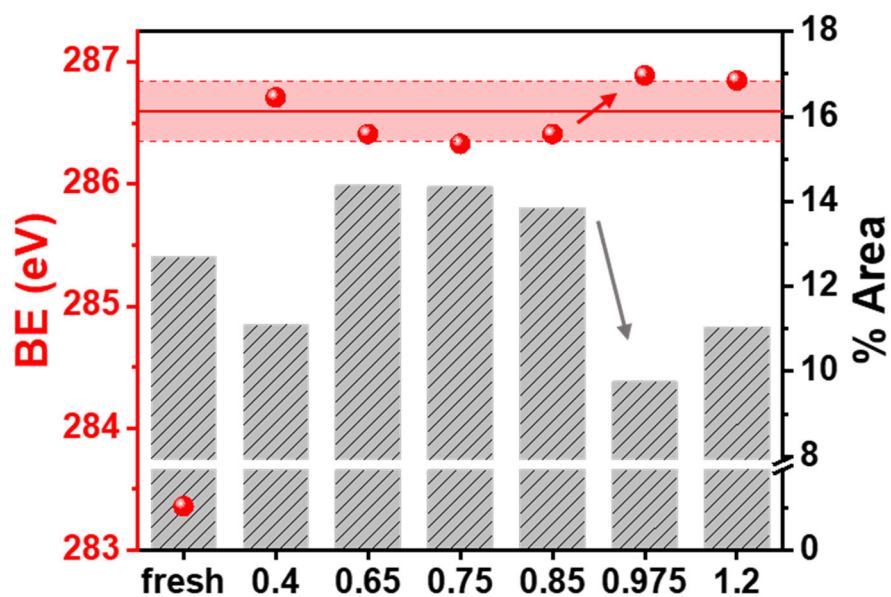

**Figure S11.** XPS analysis showing the position of the broad peaks centered around 286.6 eV in the C 1s region of  $\beta$ -Mo<sub>2</sub>C-*x* (left axis) and the corresponding percentage of peak area (right axis). The pink strip represents the averaged peak positions, in 1 $\sigma$  standard deviation, for  $\beta$ -Mo<sub>2</sub>C-*x* (*x*=0.4, 0.65, 0.75, 0.85, 0.975, and 1.2). The carbidic C-Mo peak for freshly prepared Mo<sub>2</sub>C is included as the reference.

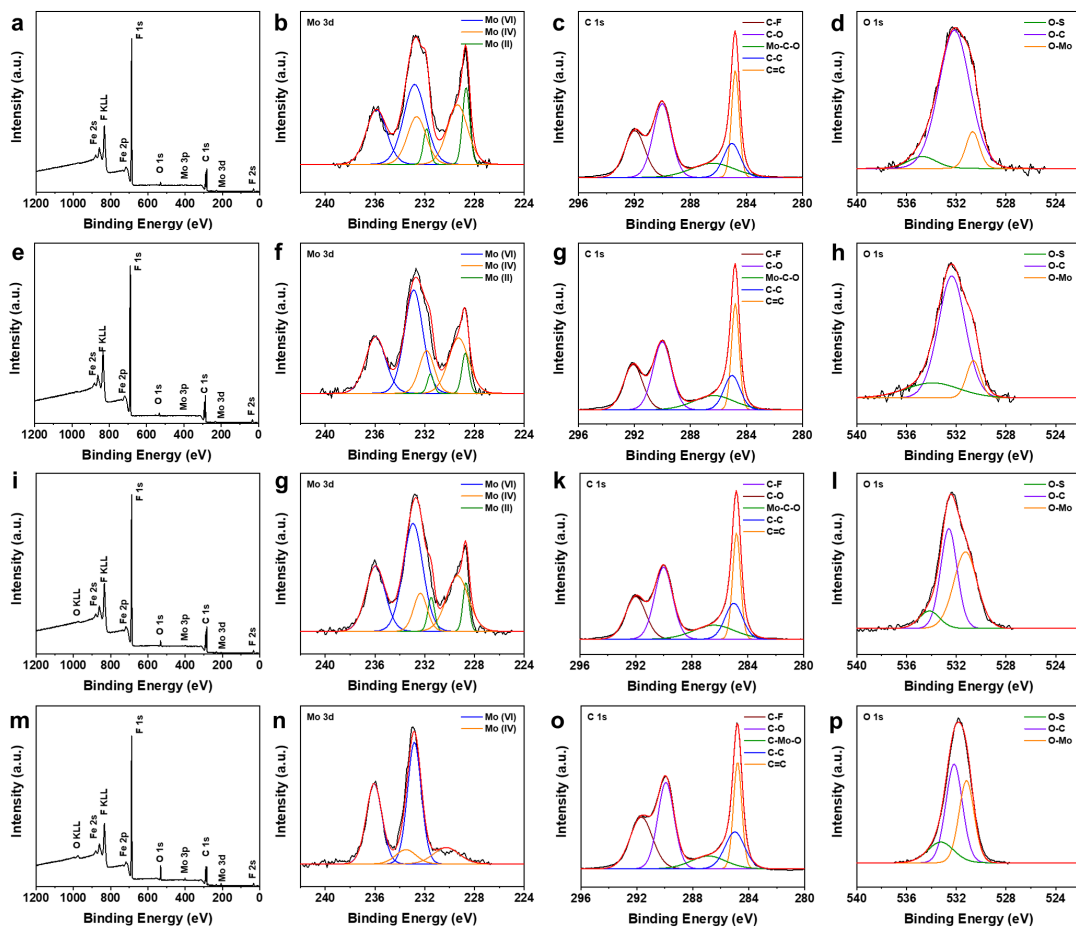

**Figure S12.** XPS of survey scan, Mo 3d, C 1s, and O 1s for  $\beta$ -Mo<sub>2</sub>C-*x*, where *x* is (a-d) 0.65, (e-h) 0.75, (i-l) 0.85, and (m-p) 0.975.

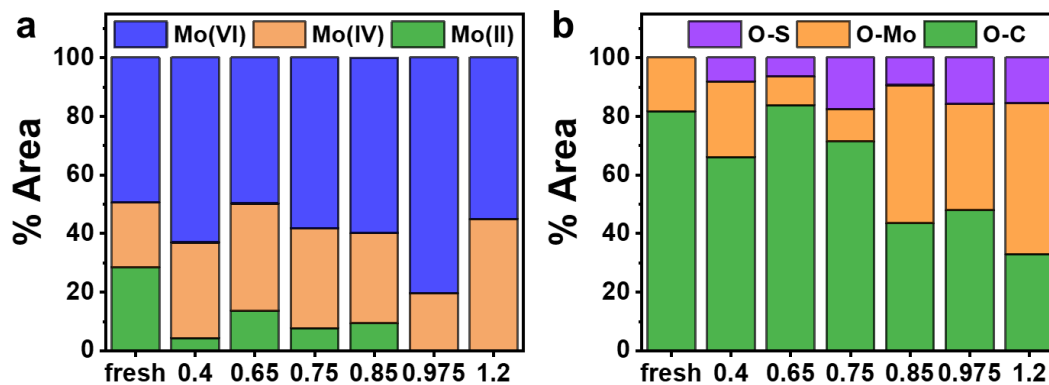

**Figure S13.** Analysis of the XPS peak areas for (a) Mo and (b) O for samples treated under different potentials.

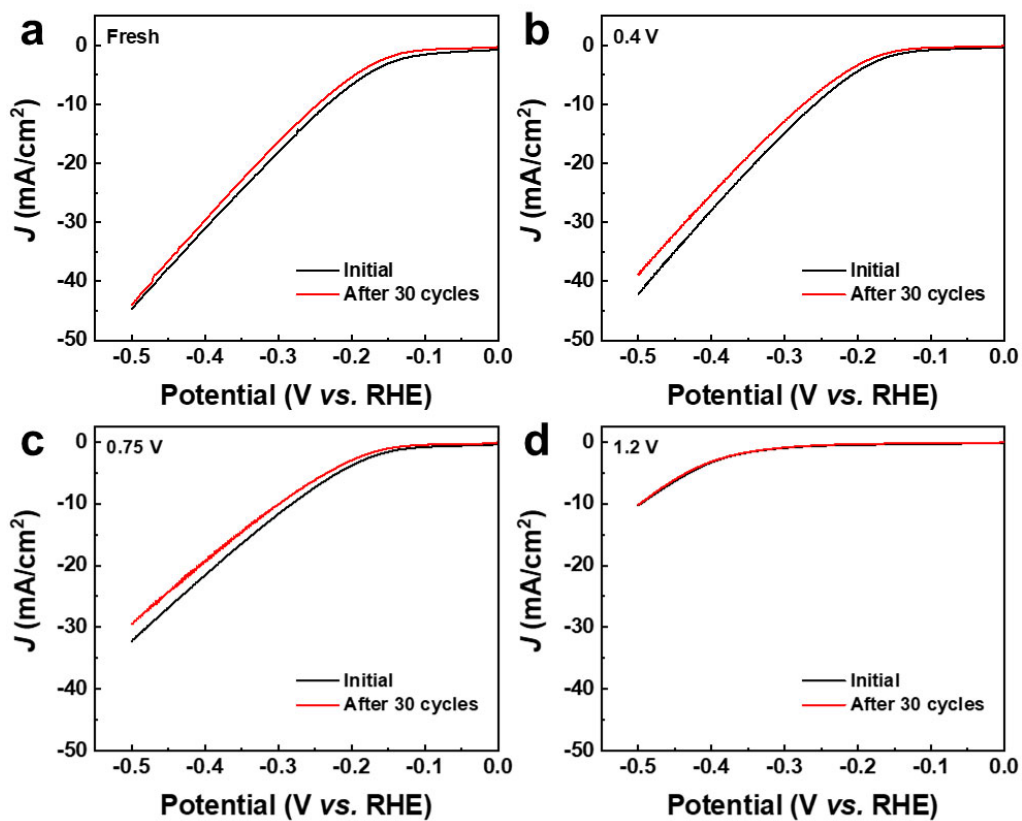

**Figure S14.** Polarization curves of freshly prepared and oxidized  $\beta$ -Mo<sub>2</sub>C- $x$  ( $x=0.4, 0.75,$  and  $1.2$ ) electrocatalysts for HER before and after 30 CV cycles in the range of 0~-0.5 V (vs. RHE).

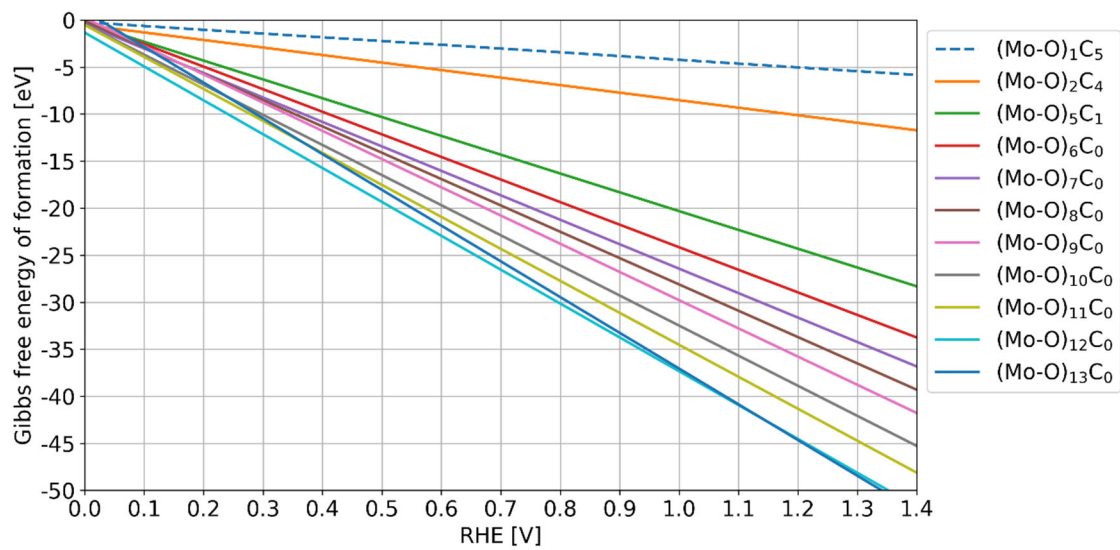

**Figure S15:** Gibbs free energy for the formation of C\*-to-O\* substituted surfaces.

## Tables

**Table S1.** Values of Gibbs free energy for the molecules studied in this work\*

| Molecule         | PBE     | HSE06   |
|------------------|---------|---------|
| H <sub>2</sub>   | -6.806  | -7.869  |
| H <sub>2</sub> O | -14.218 | -17.468 |
| CO               | -15.165 | -18.600 |
| CO <sub>2</sub>  | -23.205 | -28.634 |

\*: All values are in eV.

**Table S2.** Results of XPS analyses

| <b><math>\beta</math>-Mo<sub>2</sub>C (as-prepared)</b> |               |                  |        |            |         |
|---------------------------------------------------------|---------------|------------------|--------|------------|---------|
| Name                                                    | Position (eV) | $\Delta$ BE (eV) | % Area | Area ratio | FWHM    |
| O-C                                                     | 531.98        | /                | 81.69  | /          | 3.07    |
| O-Mo                                                    | 530.61        | /                | 18.31  | /          | 1.17    |
| C-O                                                     | 286.76        | /                | 19.91  | /          | 5.4     |
| C-C                                                     | 284.98        | /                | 38.79  | /          | 1.97    |
| C=C                                                     | 284.8         | /                | 28.6   | /          | 0.77    |
| C-Mo                                                    | 283.36        | /                | 12.7   | /          | 1.27    |
| Mo (VI) 3d <sub>3/2</sub>                               | 235.89        | 2.84             | 19.33  | 0.64198    | 1.97    |
| Mo (VI) 3d <sub>5/2</sub>                               | 233.05        | /                | 30.11  | /          | 1.81    |
| Mo (IV) 3d <sub>3/2</sub>                               | 232.37        | 2.53             | 8.41   | 0.61477    | 1.23    |
| Mo (IV) 3d <sub>5/2</sub>                               | 229.84        | /                | 13.68  | /          | 1.56    |
| Mo (II) 3d <sub>3/2</sub>                               | 232.7         | 3.91             | 12.49  | 0.7816     | 1.4     |
| Mo (II) 3d <sub>5/2</sub>                               | 228.79        | /                | 15.98  | /          | 0.99    |
| <b><math>\beta</math>-Mo<sub>2</sub>C-0.4</b>           |               |                  |        |            |         |
| Name                                                    | Position (eV) | $\Delta$ BE (eV) | % Area | Area ratio | FWHM    |
| O-S                                                     | 534.2115      | /                | 8.15   | /          | 1.69747 |
| O-C                                                     | 532.3142      | /                | 66.07  | /          | 1.82613 |
| O-Mo                                                    | 530.9864      | /                | 25.78  | /          | 1.71839 |
| C-F                                                     | 291.8787      | /                | 20.65  | /          | 1.67585 |
| C-O                                                     | 290.0209      | /                | 30.18  | /          | 1.58875 |
| Mo-C-O                                                  | 286.7055      | /                | 11.11  | /          | 2.98918 |
| C-C                                                     | 284.9736      | /                | 17.88  | /          | 1.53751 |
| C=C                                                     | 284.7822      | /                | 20.18  | /          | 0.66305 |
| Mo (VI) 3d <sub>3/2</sub>                               | 235.9543      | 3.0678           | 22.73  | 0.5636     | 1.69433 |
| Mo (VI) 3d <sub>5/2</sub>                               | 232.8865      | /                | 40.33  | /          | 1.8793  |
| Mo (IV) 3d <sub>3/2</sub>                               | 232.4047      | 3.1317           | 11.51  | 0.54524    | 1.89608 |
| Mo (II) 3d <sub>3/2</sub>                               | 230.813       | 2.0952           | 1.51   | 0.53737    | 0.5779  |
| Mo (IV) 3d <sub>5/2</sub>                               | 229.273       | /                | 21.11  | /          | 1.91918 |



| Mo (II) 3d <sub>5/2</sub>     | 228.7178      | /        | 2.81   | /          | 0.578   |
|-------------------------------|---------------|----------|--------|------------|---------|
| <b>β-Mo<sub>2</sub>C-0.65</b> |               |          |        |            |         |
| Name                          | Position (eV) | ΔBE (eV) | % Area | Area ratio | FWHM    |
| O-S                           | 534.7407      | /        | 6.47   | /          | 2.65846 |
| O-C                           | 532.1506      | /        | 83.82  | /          | 2.95505 |
| O-Mo                          | 530.6793      | /        | 9.71   | /          | 1.28373 |
| C-F                           | 291.9772      | /        | 22.06  | /          | 1.70079 |
| C-O                           | 290.0222      | /        | 31     | /          | 1.51986 |
| Mo-C-O                        | 286.4065      | /        | 14.38  | /          | 3.65095 |
| C-C                           | 285.0408      | /        | 13.38  | /          | 1.42234 |
| C=C                           | 284.8         | /        | 19.17  | /          | 0.64689 |
| Mo (VI) 3d <sub>3/2</sub>     | 235.89        | 3.0803   | 19.32  | 0.63427    | 1.93371 |
| Mo (VI) 3d <sub>5/2</sub>     | 232.8097      | /        | 30.46  | /          | 2.08344 |
| Mo (IV) 3d <sub>3/2</sub>     | 232.6444      | 3.2793   | 15.47  | 0.73144    | 1.76998 |
| Mo (II) 3d <sub>3/2</sub>     | 231.8482      | 3.1783   | 3.97   | 0.41225    | 0.60493 |
| Mo (IV) 3d <sub>5/2</sub>     | 229.3651      | /        | 21.15  | /          | 1.93922 |
| Mo (II) 3d <sub>5/2</sub>     | 228.6699      | /        | 9.63   | /          | 0.67946 |
| <b>β-Mo<sub>2</sub>C-0.75</b> |               |          |        |            |         |
| Name                          | Position (eV) | ΔBE (eV) | % Area | Area ratio | FWHM    |
| O-S                           | 533.9025      | /        | 117.52 | /          | 5.10628 |
| O-C                           | 532.3564      | /        | 71.37  | /          | 2.57159 |
| O-Mo                          | 530.619       | /        | 11.11  | /          | 1.30416 |
| C-F                           | 292.0926      | /        | 21.21  | /          | 1.60123 |
| C-O                           | 290.017       | /        | 30.72  | /          | 1.55048 |
| Mo-C-O                        | 286.3333      | /        | 14.35  | /          | 3.43975 |
| C-C                           | 285.0323      | /        | 13.62  | /          | 1.35511 |
| C=C                           | 284.8         | /        | 20.1   | /          | 0.64813 |
| Mo (VI) 3d <sub>3/2</sub>     | 235.9501      | 3.064    | 21.77  | 0.59627    | 1.90902 |
| Mo (VI) 3d <sub>5/2</sub>     | 232.8861      | /        | 36.51  | /          | 1.74481 |
| Mo (IV) 3d <sub>3/2</sub>     | 231.846       | 2.5652   | 12.3   | 0.56656    | 1.4238  |

| Mo (II) 3d <sub>3/2</sub>                       | 231.5364      | 2.8037           | 2.33   | 0.43309    | 0.58767 |
|-------------------------------------------------|---------------|------------------|--------|------------|---------|
| Mo (IV) 3d <sub>5/2</sub>                       | 229.2808      | /                | 21.71  | /          | 1.92779 |
| Mo (II) 3d <sub>5/2</sub>                       | 228.7327      | /                | 5.38   | /          | 0.65256 |
| <b><math>\beta</math>-Mo<sub>2</sub>C-0.85</b>  |               |                  |        |            |         |
| Name                                            | Position (eV) | $\Delta$ BE (eV) | % Area | Area ratio | FWHM    |
| O-S                                             | 534.165       | /                | 9.4    | /          | 1.93386 |
| O-C                                             | 532.5974      | /                | 43.49  | /          | 1.56649 |
| O-Mo                                            | 531.2625      | /                | 47.11  | /          | 2.21014 |
| C-F                                             | 292.0062      | /                | 20.48  | /          | 1.70086 |
| C-O                                             | 290.0153      | /                | 30.79  | /          | 1.51909 |
| Mo-C-O                                          | 286.4082      | /                | 13.85  | /          | 3.50515 |
| C-C                                             | 284.9947      | /                | 14.91  | /          | 1.47076 |
| C=C                                             | 284.8         | /                | 19.97  | /          | 0.66622 |
| Mo (VI) 3d <sub>3/2</sub>                       | 235.9605      | 3.021            | 22.32  | 0.59472    | 1.8292  |
| Mo (VI) 3d <sub>5/2</sub>                       | 232.9395      | /                | 37.53  | /          | 1.86242 |
| Mo (IV) 3d <sub>3/2</sub>                       | 232.351       | 2.9862           | 9.13   | 0.42132    | 1.28478 |
| Mo (II) 3d <sub>3/2</sub>                       | 231.4763      | 2.795            | 4.08   | 0.77567    | 0.63659 |
| Mo (IV) 3d <sub>5/2</sub>                       | 229.3648      | /                | 21.67  | /          | 2.08254 |
| Mo (II) 3d <sub>5/2</sub>                       | 228.6813      | /                | 5.26   | /          | 0.57298 |
| <b><math>\beta</math>-Mo<sub>2</sub>C-0.975</b> |               |                  |        |            |         |
| Name                                            | Position (eV) | $\Delta$ BE (eV) | % Area | Area ratio | FWHM    |
| O-S                                             | 533.248       | /                | 15.82  | /          | 2.48381 |
| O-C                                             | 532.1743      | /                | 47.89  | /          | 1.57908 |
| O-Mo                                            | 531.1761      | /                | 36.29  | /          | 1.43687 |
| C-F                                             | 291.6847      | /                | 25.02  | /          | 1.89404 |
| C-O                                             | 289.9226      | /                | 30.49  | /          | 1.38207 |
| Mo-C-O                                          | 286.8932      | /                | 9.76   | /          | 2.98105 |
| C-C                                             | 284.9986      | /                | 15.57  | /          | 1.65449 |
| C=C                                             | 284.8         | /                | 19.16  | /          | 0.70041 |
| Mo (VI) 3d <sub>3/2</sub>                       | 236.0738      | 3.2426           | 34.47  | 0.75065    | 1.48774 |

| Mo (IV) 3d <sub>3/2</sub>                     | 233.5117      | 3.2462           | 7.97   | 0.68471    | 1.92654 |
|-----------------------------------------------|---------------|------------------|--------|------------|---------|
| Mo (VI) 3d <sub>5/2</sub>                     | 232.8312      | /                | 45.92  | /          | 1.30572 |
| Mo (IV) 3d <sub>5/2</sub>                     | 230.2655      | /                | 11.64  | /          | 2.4563  |
| <b><math>\beta</math>-Mo<sub>2</sub>C-1.2</b> |               |                  |        |            |         |
| Name                                          | Position (eV) | $\Delta$ BE (eV) | % Area | Area ratio | FWHM    |
| O-S                                           | 533.0158      | /                | 15.56  | /          | 3.42747 |
| O-C                                           | 532.1774      | /                | 32.97  | /          | 1.99856 |
| O-Mo                                          | 531.5116      | /                | 51.48  | /          | 1.83032 |
| C-F                                           | 291.5644      | /                | 24.37  | /          | 2.00869 |
| C-O                                           | 289.9701      | /                | 27.67  | /          | 1.35202 |
| Mo-C-O                                        | 286.8508      | /                | 11.05  | /          | 3.13211 |
| C-C                                           | 284.9174      | /                | 18.29  | /          | 1.60281 |
| C=C                                           | 284.8         | /                | 18.62  | /          | 0.72021 |
| Mo (VI) 3d <sub>3/2</sub>                     | 236.0539      | 3.1551           | 21.69  | 0.64999    | 1.22954 |
| Mo (IV) 3d <sub>3/2</sub>                     | 233.2753      | 4.4541           | 18.62  | 0.70745    | 6.67    |
| Mo (VI) 3d <sub>5/2</sub>                     | 232.8988      | /                | 33.37  | /          | 1.20159 |
| Mo (IV) 3d <sub>5/2</sub>                     | 228.8212      | /                | 26.32  | /          | 6.67388 |

**Table S3.** Computationally obtained parameters

| Potential (V) | Barrier for CO desorption (eV) | Current density (mA/cm <sup>2</sup> ) |
|---------------|--------------------------------|---------------------------------------|
| 0.28          | 0.71                           | 1.24e+2                               |
| 0.51          | 0.07                           | 8.15e+12                              |

**Table S4.** Computational results of water adsorption energy on oxidized surfaces of Mo<sub>2</sub>C

| Starting Surface                       | $\Delta G$ Binding energy (eV) |
|----------------------------------------|--------------------------------|
| (Mo-O) <sub>0</sub> (C-O) <sub>0</sub> | -1.06                          |
| (Mo-O) <sub>0</sub> (C-O) <sub>6</sub> | -0.30                          |
| (Mo-O) <sub>1</sub> (C-O) <sub>6</sub> | -0.13                          |
| (Mo-O) <sub>2</sub> (C-O) <sub>6</sub> | -0.1                           |
| (Mo-O) <sub>3</sub> (C-O) <sub>6</sub> | 0.19                           |

**Table S5.** Energy barriers for CO and CO<sub>2</sub> desorptions with transition states at HSE refined single point energies. Numbers in parentheses are barriers in eV obtained using PBE functional

| Surface                                | CO                                                                                                                | CO <sub>2</sub>                                                                                         |
|----------------------------------------|-------------------------------------------------------------------------------------------------------------------|---------------------------------------------------------------------------------------------------------|
| (Mo-O) <sub>0</sub> (C-O) <sub>1</sub> | 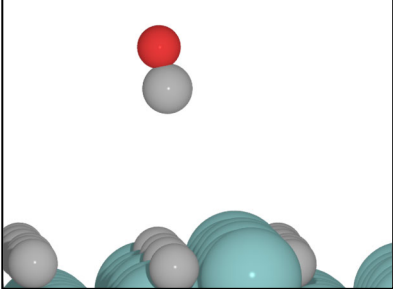 <p>1.39 (1.72) No TS found</p>  | -                                                                                                       |
| (Mo-O) <sub>0</sub> (C-O) <sub>6</sub> |  <p>1.79 (1.98) No TS found</p> |  <p>2.58 (2.44)</p>  |
| (Mo-O) <sub>1</sub> (C-O) <sub>6</sub> |  <p>1.61 (1.18)</p>            |  <p>2.75 (2.34)</p> |
| (Mo-O) <sub>3</sub> (C-O) <sub>6</sub> |  <p>Type 1: 0.73 (0.84)</p>    |  <p>1.05 (1.11)</p> |

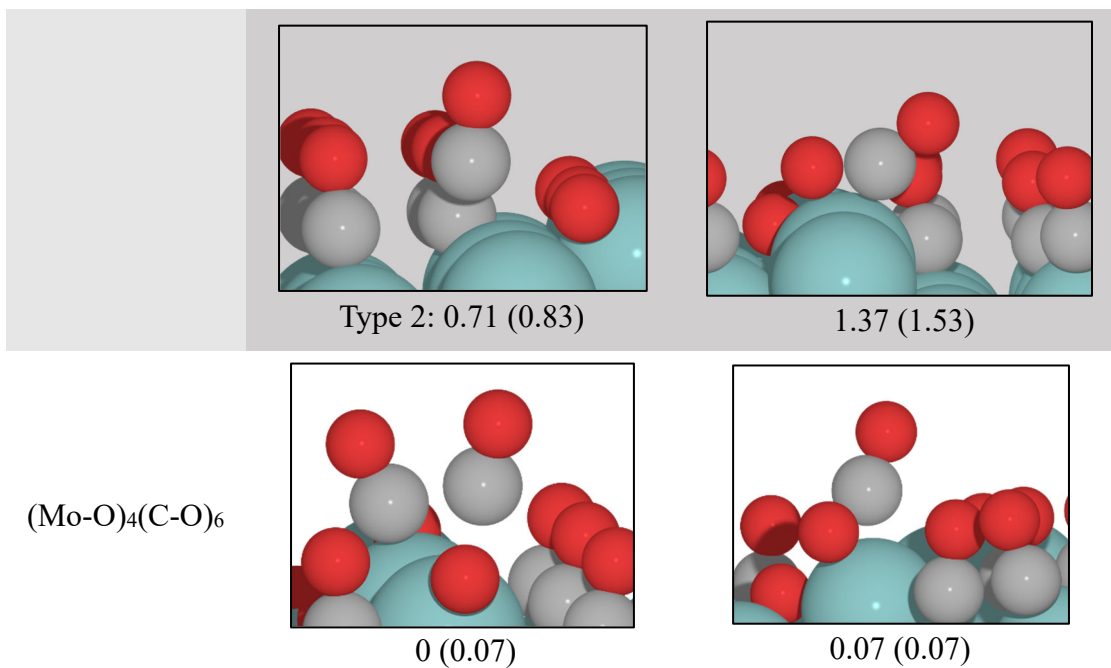

Cyan, Grey and Red balls represent Mo, C and O atoms respectively.

We also simulated CO desorption on a surface formed after substitution of three CO\* molecules with three O\* atoms, for which the PBE barrier was found to be 0.59 (0.47) eV.

**Table S6.** Convergence criteria for  $k$  point grid for surface calculations

| $k$ -point grid       | $\Delta E_{\text{EO}}$ (eV)<br>(against $5 \times 6 \times 1$ ) | Time for 1 iteration within<br>SCF loop (s) |
|-----------------------|-----------------------------------------------------------------|---------------------------------------------|
| $1 \times 1 \times 1$ | 0.485                                                           | 0.34                                        |
| $2 \times 2 \times 1$ | -0.029                                                          | 0.37                                        |
| $3 \times 3 \times 1$ | -0.017                                                          | 1.23                                        |
| $4 \times 5 \times 1$ | 0.007                                                           | 1.86                                        |
| $5 \times 6 \times 1$ | 0                                                               | 2.76                                        |



**Table S7.** Influence of dipole corrections on oxygen binding energy\*

|                        | $E_{clean}$ | $E_{O^*}$ | $\frac{1}{2}E_{O_2}$ | $BE_O$ |
|------------------------|-------------|-----------|----------------------|--------|
| No dipole              | -405.546    | -413.846  | -4.924               | -3.375 |
| With dipole correction | -405.541    | -413.843  | -4.924               | -3.378 |

\*: All values are in eV.

**Table S8.** Binding sites for individual H<sub>2</sub>O derived species with their energies in eV

| Species           | Mo                                                                                                        | C site                                                                                                      |
|-------------------|-----------------------------------------------------------------------------------------------------------|-------------------------------------------------------------------------------------------------------------|
| O*                | 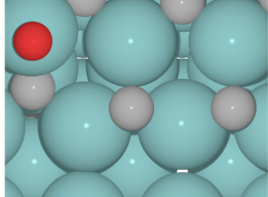<br>$\Delta G = -0.26$   | <br>$\Delta G = -0.47$   |
| OH*               | <br>$\Delta G = -0.64$   | <br>$\Delta G = -0.33$   |
| H*                | <br>$\Delta G = -0.16$ | <br>$\Delta G = -1.12$ |
| H <sub>2</sub> O* | <br>$\Delta G = -1.06$ | H <sub>2</sub> O moved to Mo or desorbs from the surface                                                    |

**Table S9.** Gibbs free energy change for replacement of single C\* to O\* at two coverages

| Surface prior to substitution          | $\Delta G$ at $U_{\text{RHE}} = 0$ V (eV) | $\Delta G$ at $U_{\text{RHE}} = 1.2$ V (eV) |
|----------------------------------------|-------------------------------------------|---------------------------------------------|
| (Mo-O) <sub>0</sub> (C-O) <sub>1</sub> | -0.22                                     | -5.02                                       |
| (Mo-O) <sub>0</sub> (C-O) <sub>6</sub> | -1.02                                     | -5.82                                       |

## References

1. A. Shrestha, X. Gao, J. C. Hicks and C. Paolucci, *Chem. Mater.*, 2021, **33**, 4606-4620.
2. G. Henkelman, B. P. Uberuaga and H. Jónsson, *J. Chem. Phys.*, 2000, **113**, 9901-9904.
3. G. Henkelman and H. Jónsson, 2000, **113**, 9978-9985.
4. K. Mathew, V. Kolluru, S. Mula, S. N. Steinmann and R. G. Hennig, *J. Chem. Phys.*, 2019, **151**, 234101.
5. K. Mathew, R. Sundararaman, K. Letchworth-Weaver, T. A. Arias and R. G. Hennig, *J. Chem. Phys.*, 2014, **140**, 084106.
6. K. Mathew, Rhennig and J. Bértoli, VASPsol: VASPsol Solvation Module V1.0, <https://doi.org/10.5281/zenodo.2555053>.
7. R. A. Mir, P. Sharma and O. P. Pandey, *Sci. Rep.*, 2017, **7**, 3518.
8. Y. Chen, H. Zhang, J. Zhang, J. Ma, H. Ye, G. Qian, Y. Ye and S. Zhong, *Mater. Sci. Appl.*, 2011, **2**, 1313.
9. N. S. Alhajri, D. H. Anjum and K. Takanabe, *J. Mater. Chem. A*, 2014, **2**, 10548-10556.
